# Supplementary material for: Immunoproteomics Reveals Pathogen’s Antigens Involved in Homo sapiens–Histoplasma capsulatum Interaction and Specific Linear B-Cell Epitopes in Histoplasmosis
Source: Front Cell Infect Microbiol. 2020 Oct 29;10:591121. doi: 10.3389/fcimb.2020.591121 (PMC7673445; doi:10.3389/fcimb.2020.591121)
Supplement: Supplementary file 2 [file Table_1.xlsx]

## Sheet: Table S1
Table S1. Proteins from Histoplasma capsulatum yeast protein extract recognized by the serum pool of patients with histoplasmosis.
Protein entry a	Protein name a
A6QTV7	116 kDa U5 small nuclear ribonucleoprotein component
C0P040	30S ribosomal protein S10
F0UUV5	30S ribosomal protein S7
C0NGV8	37S ribosomal protein Rsm22
C6H2X8	37S ribosomal protein Rsm24
C0NNH6	37S ribosomal protein S16
C0NIU8	37S ribosomal protein S25, mitochondrial
C0NNU6	37S ribosomal protein S5
C0NZV6	37S ribosomal protein S9
A6RDL7	3-hydroxybutyryl CoA dehydrogenase
A6R9C3	40S ribosomal protein S1
A6RDR5	40S ribosomal protein S11
C0NBT1	40S ribosomal protein S13
C0NFV8	40S ribosomal protein S15
C0NVE6	40S ribosomal protein S16
C0NVC6	40S ribosomal protein S17
A6RGA1	40S ribosomal protein S18
C0NEP3	40S ribosomal protein S22
C6H1S8	40S ribosomal protein S3
A6RC79	40S ribosomal protein S4
A6QYH3	40S ribosomal protein S5
C0NF40	40S ribosomal protein S5A
C0NJY5	40S ribosomal protein S6
A6R8H2	40S ribosomal protein S7
C0NST9	40S ribosomal protein S8
F0URM8	40S ribosomal protein S9
F0UH89	50S ribosomal protein
C0NVE7	50S ribosomal protein L13
C0NFE6	50S ribosomal protein L4
C0NC90	60S acidic ribosomal protein P0
F0USJ3	60S ribosomal protein
A6R237	60S ribosomal protein L10-B
C0NAG5	60S ribosomal protein L11
A6R3M3	60S ribosomal protein L11-1
A6RDK0	60S ribosomal protein L13
C0NEU1	60S ribosomal protein L17
C0NMF6	60S ribosomal protein L18
A6RCV5	60S ribosomal protein L18-B
A6RFU9	60S ribosomal protein L2
A6R1T5	60S ribosomal protein L20
C0NI22	60S ribosomal protein L22
C0NE75	60S ribosomal protein L23
C0NRH5	60S ribosomal protein L24
C0NV31	60S ribosomal protein L27
C0NNL2	60S ribosomal protein L3
C0NHE0	60S ribosomal protein L31E
C0NWM3	60S ribosomal protein L32
C0NAQ6	60S ribosomal protein L33
C6H9U0	60S ribosomal protein L34
C0NBJ7	60S ribosomal protein L34B
C0NJ90	60S ribosomal protein L35
A6R3H7	60S ribosomal protein L36
C0NWA6	60S ribosomal protein L37A
A6R893	60S ribosomal protein L43
A6RCN9	60S ribosomal protein L44
A6QSW2	60S ribosomal protein L4-A
A6QWN6	60S ribosomal protein L6
A6RGE0	60S ribosomal protein L7
C0NHA4	60S ribosomal protein L7A
C0NQR6	60S ribosomal protein L9B
C6H4P0	Aconitate hydratase
P53455	Actin
C0NUF9	ADP,ATP carrier protein
A6RFF1	Aldehyde dehydrogenase
A6R263	Alternative oxidase
Q9Y711	Alternative oxidase, mitochondrial
C0NB88	Amidase
C0NU76	AMP dependent synthetase and ligase
C0NQ19	AP-1 complex subunit theta-1
A6QRM9	Arginase
A6QZM1	ATP synthase subunit 4
C0NG75	ATP synthase subunit alpha
C0P0C5	ATP synthase subunit beta
F0UVB2	ATP synthase subunit D
A6QXR4	ATP synthase subunit gG
F0UP51	ATP-dependent DNA ligase
C6HFF1	ATP-dependent DNA ligase domain-containing protein
C6HA52	ATP-dependent molecular chaperone HSC82
C6HC35	Bacterial-type chitinase
C0NSG3	Beta-hexosaminidase
A6R3K2	CaaX prenyl protease
C0NN26	Calnexin
C0NVF6	Catalase
Q9Y7C2	Catalase B
C6HHE1	Catalase isozyme P
F0UAW4	Chitinase
C6HLQ4	Clathrin coat assembly protein ap19
C0NT81	Condensin subunit
C6HFD0	Condensin subunit Cnd3
A6QRM4	Conserved hypothetical protein HCAG_00030
A6QTM7	Conserved hypothetical protein HCAG_00733
A6QUJ3	Conserved hypothetical protein HCAG_01049
A6R339	Conserved hypothetical protein HCAG_04047
A6R533	Conserved hypothetical protein HCAG_04741
A6RGN4	Conserved hypothetical protein HCAG_08801
C0NBY6	Conserved hypothetical protein HCBG_00632
C0NIU3	Conserved hypothetical protein HCBG_02350
C0NM92	Conserved hypothetical protein HCBG_04622
C0NNH1	Conserved hypothetical protein HCBG_04701
C0NNQ6	Conserved hypothetical protein HCBG_04786
C0NRC2	Conserved hypothetical protein HCBG_05552
C0NUV8	Conserved hypothetical protein HCBG_06722
C0NVA1	Conserved hypothetical protein HCBG_07081
C0P102	Conserved hypothetical protein HCBG_09082
F0U7X7	Conserved hypothetical protein HCDG_00161
C6H4Y3	Conserved hypothetical protein HCDG_00304
F0U960	Conserved hypothetical protein HCDG_01216
C6H866	Conserved hypothetical protein HCDG_01627
C6HA95	Conserved hypothetical protein HCDG_03126
C6HHJ5	Conserved hypothetical protein HCDG_05676
C6HIX8	Conserved hypothetical protein HCDG_06012
C6HMR0	Conserved hypothetical protein HCDG_07376
C6HRH4	Conserved hypothetical protein HCDG_08559
C6HTC3	Conserved hypothetical protein HCDG_09454
C6HTF1	Conserved hypothetical protein HCDG_09482
F0UII7	Conserved hypothetical protein HCEG_04807
F0UL58	Conserved hypothetical protein HCEG_05377
F0UME2	Conserved hypothetical protein HCEG_06501
F0URH9	Conserved hypothetical protein HCEG_07721
F0USW1	Conserved hypothetical protein HCEG_08203
C0NWB4	Curved DNA-binding protein
A6R882	Curved DNA-binding protein 42 kDa protein
C6H812	Cytochrome b-c1 complex subunit 7
A6QU87	Cytochrome b-c1 complex subunit Rieske, mitochondrial
C0NTD8	Cytochrome c oxidase polypeptide VI
C0P1G5	Cytochrome c oxidase subunit 2
C0P0B5	Cytochrome c oxidase subunit V
C0NQD9	Cytochrome c1
F0UC16	Cytochrome P450 monooxygenase
C6H6L8	Cytosolic large ribosomal subunit protein L30
A6R236	Cytosolic large ribosomal subunit protein L7A
C0NIZ0	DEAD_2 domain-containing protein
C6H907	DEAD_2 protein
F0UAE5	DEAD-box protein
C0NJM2	Dihydrolipoamide acetyltransferase component of pyruvate dehydrogenase complex
C6HP67	Dihydrolipoamide S-succinyltransferase
A6R1L4	Dihydrolipoamide succinyltransferase
A6R1L4	Dihydrolipoyllysine-residue succinyltransferase component of 2-oxoglutarate dehydrogenase complex, mitochondrial
A6RGN1	Elongation factor 1 alpha
C0NRJ7	Fasciclin domain family
C0NKS4	Glutaminase
C6HB15	Glutaminase A
C0NRN1	Glyceraldehyde-3-phosphate dehydrogenase
C0NJU3	Glycerol-3-phosphate O-acyltransferase
C0NH00	H/ACA ribonucleoprotein complex subunit
C0NBV8	Heat shock protein
P33125	Heat shock protein 82
A6R1L6	Histone H2A
A6R1L7	Histone H2B
C0NL60	Histone H3
A6R2M7	Histone H4
C0NDC6	Large subunit ribosomal protein L3
C0NTX9	L-xylulose reductase
C0NZ92	LYR family protein
O13373	M antigen
A6R6X1	Mitochondrial 37S ribosomal protein MRP2
A6R9B6	Mitochondrial 37S ribosomal protein RSM10
F0U636	Mitochondrial 37S ribosomal protein RSM27
C0NGW1	Mitochondrial 40S ribosomal protein MRP2
F0UH16	Mitochondrial 54S ribosomal protein MRPL51
C6HP82	Mitochondrial 54S ribosomal protein YmL20
A6QTR8	Mitochondrial 54S ribosomal protein YmL3
C0NP84	Mitochondrial ATP synthase subunit F
A6QUB7	Mitochondrial F1F0 ATP synthase subunit F
C6HMG1	Mitochondrial F1F0 ATP synthase subunit F Atp17
C6HPG4	Mitochondrial large ribosomal subunit
C0NEQ9	Mitochondrial phosphate carrier protein
A6QY85	Mitochondrial processing peptidase beta subunit
C0NEW1	Mitochondrial processing peptidase subunit
F0UC56	Mitochondrial ribosomal protein DAP3
C0NFC5	Mitochondrial ribosomal protein subunit L51
C0NNV4	Mitochondrial ribosome small subunit component S19
C0NBJ8	mRNA splicing protein PRP8
C0NR32	NADH dehydrogenase [ubiquinone] 1 alpha subcomplex subunit
C0P0E1	NADH-ubiquinone oxidoreductase
C6HMG0	NADH-ubiquinone oxidoreductase 21 kDa subunit
A6QUB6	NADH-ubiquinone oxidoreductase 21 kDa subunit, mitochondrial
C6H6P9	NADH-ubiquinone oxidoreductase 40 kDa subunit
A6R6J0	NADH-ubiquinone oxidoreductase 40 kDa subunit, mitochondrial
C6HGM0	NADH-ubiquinone oxidoreductase 78 kDa subunit
C0NHN5	Nascent polypeptide-associated complex subunit alpha
A6R5Z3	Nascent polypeptide-associated complex subunit beta
C6HLZ8	Nipsnap family protein
F0UP30	Nuclear condensin complex subunit 3
F0U588	Outer mitochondrial membrane porin protein
C0NIQ1	Outer mitochondrial membrane protein porin
C6HHT7	Para-aminobenzoate synthase PabaA
A6R9I6	Plasma membrane ATPase
A6QU02	Predicted protein HCAG_00858
A6QUI7	Predicted protein HCAG_01043
A6R0F1	Predicted protein HCAG_03108
C0NE88	Predicted protein HCBG_02181
F0UG05	Predicted protein HCBG_04269
C6HG95	Predicted protein HCBG_05435
F0UQL8	Processing/enhancing protein
C0NCN3	Prohibitin
A6R225	Prohibitin-2
C0NZX6	Proteasome subunit alpha type
C0NHK6	Protein MAK16
C0NPA5	Pumilio domain-containing protein c
Q1HRW7	Putative high affinity copper transporter
F0UEG3	putative small nuclear ribonucleoprotein
C0NG25	Ribonuclease P protein subunit p30
F0UCG4	Ribose-phosphate pyrophosphokinase
C0NDH6	Ribose-phosphate pyrophosphokinase 1
C6HB67	Ribose-phosphate pyrophosphokinase II
C0NCP4	Ribosomal L10 protein
A6REK7	Ribosomal protein L13
C0NHN4	Ribosomal protein L14
A6R1V3	Ribosomal protein L15
C0NMA2	Ribosomal protein L19
C0NI22	Ribosomal protein L22
A6R6D4	Ribosomal protein L31e
C6H9U0	Ribosomal protein L34 protein
F0U7R8	Ribosomal protein L37
F0UB50	Ribosomal protein L37a
A6R4V4	Ribosomal protein S13
A6R4L7	Ribosomal protein S16
F0URZ8	Ribosomal protein S2
A6RE96	Ribosomal protein S5
A6REK8	Ribosomal protein S9
C0NLR4	Ribosomal protein Srp1
C6HP82	Ribosomal protein YmL20
C6HMI5	RNA binding protein Jsn1
C0NTU6	RNase III domain-containing protein
C0NMB4	Serine hydroxymethyltransferase
C6H2B4	Short chain dehydrogenase/reductase
F0US72	Shugoshin
C6HQC2	Small nuclear ribonucleoprotein
C0NPI9	Small nuclear ribonucleoprotein F
A6QYU6	Small nuclear ribonucleoprotein Sm D2
C0NY06	Small nuclear ribonucleoprotein Sm D3
A6QZH3	Small nuclear ribonucleoprotein SmG
A6QTC0	Sorbitol utilization protein SOU1
F0UF36	SsDNA binding protein
C0NJH7	Stomatin family protein
A6RBH9	Succinate dehydrogenase [ubiquinone] flavoprotein subunit, mitochondrial
C0NQC7	Succinate dehydrogenase [ubiquinone] iron-sulfur subunit, mitochondrial
C6HG15	Translocation protein
C0NNR3	U5 small nuclear ribonucleoprotein component
C0NJT9	Ubiquinol-cytochrome c reductase subunit 6
C0NB93	UTP-glucose-1-phosphate uridylyltransferase
C6HP08	V-type proton ATPase subunit
A6QW28	V-type proton ATPase subunit a
Q8J1T0	Yeast phase specific protein
Q00950	Yps-3 protein
C0NMY9	Zinc finger protein
a Protein entry was based on UniProt database (www.uniprot.org).

## Sheet: Table S2
Table S2. Proteins from Histoplasma capsulatum yeast protein extract recognized by the serum pool of patients with other mycoses or tuberculosis.
Protein entry a	Protein name a
C0P040	30S ribosomal protein S10
F0UUV5	30S ribosomal protein S7
C0NGV8	37S ribosomal protein Rsm22
C6H2X8	37S ribosomal protein Rsm24
A6QTN0	37S ribosomal protein S16
C0NNU6	37S ribosomal protein S5
C0NZV6	37S ribosomal protein S9
A6RDL7	3-hydroxybutyryl CoA dehydrogenase
F0UH88	3-hydroxyisobutyryl-CoA hydrolase, mitochondrial
C6HIF2	3-ketodihydrosphingosine reductase tsc10
A6R9C3	40S ribosomal protein S1
A6RDR5	40S ribosomal protein S11
F0U9A9	40S ribosomal protein S12
C0NBT1	40S ribosomal protein S13
C0NVE4	40S ribosomal protein S14
C0NFV8	40S ribosomal protein S15
C0NVE6	40S ribosomal protein S16
C0NVC6	40S ribosomal protein S17
A6RGA1	40S ribosomal protein S18
C0NEP3	40S ribosomal protein S22
C6HQ06	40S ribosomal protein S23
C0NGE3	40S ribosomal protein S26
C6H1S8	40S ribosomal protein S3
A6RC79	40S ribosomal protein S4
A6QYH3	40S ribosomal protein S5
C0NF40	40S ribosomal protein S5A
C0NJY5	40S ribosomal protein S6
A6R8H2	40S ribosomal protein S7
C0NST9	40S ribosomal protein S8
F0URM8	40S ribosomal protein S9
F0UH89	50S ribosomal protein
C0NVE7	50S ribosomal protein L13
C0NFE6	50S ribosomal protein L4
A6R5E8	60S acidic ribosomal protein P0
F0USJ3	60S ribosomal protein
A6R237	60S ribosomal protein L10-B
C0NAG5	60S ribosomal protein L11
C6HAF0	60S ribosomal protein L12
A6RDK0	60S ribosomal protein L13
C6H1N1	60S ribosomal protein L13a
C0NEU1	60S ribosomal protein L17
C0NMF6	60S ribosomal protein L18
A6RCV5	60S ribosomal protein L18-B
A6RFU9	60S ribosomal protein L2
A6R1T5	60S ribosomal protein L20
C0NI22	60S ribosomal protein L22
C0NE75	60S ribosomal protein L23
C0NRH5	60S ribosomal protein L24
C0NSX6	60S ribosomal protein L26
C0NV31	60S ribosomal protein L27
C0NNL2	60S ribosomal protein L3
C0NHE0	60S ribosomal protein L31E
C0NWM3	60S ribosomal protein L32
C0NAQ6	60S ribosomal protein L33
C0NBJ7	60S ribosomal protein L34B
C0NJ90	60S ribosomal protein L35
A6R3H7	60S ribosomal protein L36
C0NWA6	60S ribosomal protein L37A
A6R893	60S ribosomal protein L43
A6RCN9	60S ribosomal protein L44
A6QSW2	60S ribosomal protein L4-A
A6QWN6	60S ribosomal protein L6
A6RGE0	60S ribosomal protein L7
C0NHA4	60S ribosomal protein L7A
C0NQR6	60S ribosomal protein L9B
C6H2Z2	ABC a-pheromone efflux pump AtrD
C6H4P0	Aconitate hydratase
P53455	Actin
Q12619	Acyl-CoA desaturase
C0NUF9	ADP,ATP carrier protein
A6RFF1	Aldehyde dehydrogenase
C0NBI7	Alkaline phosphatase
C0NAM8	Alpha-mannosidase
A6R263	Alternative oxidase
Q9Y711	Alternative oxidase, mitochondrial
C0NB88	Amidase
C0NU76	AMP dependent synthetase and ligase
C0NQ19	AP-1 complex subunit theta-1
A6QRM9	Arginase
C6H5F4	Aromatic-L-amino acid decarboxylase
A6R972	Arp2/3 complex subunit Arc16
A6QZM1	ATP synthase subunit 4
C0ND07	ATP synthase subunit 5
A6R2F7	ATP synthase subunit 5, mitochondrial
C0P1F7	ATP synthase subunit a
C0NG75	ATP synthase subunit alpha
C0P0C5	ATP synthase subunit beta
F0UVB2	ATP synthase subunit D
A6R640	ATP synthase subunit d, mitochondrial
A6QXR4	ATP synthase subunit g
C0NC54	ATP synthase subunit gamma
F0UP51	ATP-dependent DNA ligase
C6HFF1	ATP-dependent DNA ligase domain-containing protein
C6HA52	ATP-dependent molecular chaperone HSC82
C0NSG3	Beta-hexosaminidase
C0NYW6	C-4 methylsterol oxidase
C0NAE1	CaaX prenyl protease
C6H7A7	Calcofluor white hypersensitive protein
C0NN26	Calnexin
F0UH61	Carboxypeptidase
C0NX46	Carboxypeptidase Y homolog A
A6QUS6	Cation-transporting ATPase 4
F0UGQ1	Cell division control protein
A6QYJ5	Cell division cycle protein 48
A6QTM7	Chitin synthase export chaperone
A6QVG7	Chitin synthase export chaperone
C6HLQ4	Clathrin coat assembly protein ap19
C0NRE5	Coatomer subunit epsilon
C6HFD0	Condensin subunit Cnd3
A6QUJ3	Conserved hypothetical protein HCAG_01049
A6R339	Conserved hypothetical protein HCAG_04047
A6R6R5	Conserved hypothetical protein HCAG_05323
A6R7M8	Conserved hypothetical protein HCAG_05636
A6RGN4	Conserved hypothetical protein HCAG_08801
C0NBY6	Conserved hypothetical protein HCBG_00632
C0NIM2	Conserved hypothetical protein HCBG_02279
C0NGZ2	Conserved hypothetical protein HCBG_02614
C0NMF3	Conserved hypothetical protein HCBG_04683
C0NNH1	Conserved hypothetical protein HCBG_04701
C0NNQ6	Conserved hypothetical protein HCBG_04786
C0NNY9	Conserved hypothetical protein HCBG_04869
C0NRC2	Conserved hypothetical protein HCBG_05552
C0NUV8	Conserved hypothetical protein HCBG_06722
C0NVA1	Conserved hypothetical protein HCBG_07081
C6H4Y3	Conserved hypothetical protein HCDG_00304
C6H7Z2	Conserved hypothetical protein HCDG_01553
C6H7D0	Conserved hypothetical protein HCDG_02331
C6HHJ5	Conserved hypothetical protein HCDG_05676
C6HIX8	Conserved hypothetical protein HCDG_06012
C6HM61	Conserved hypothetical protein HCDG_07177
C6HRH4	Conserved hypothetical protein HCDG_08559
C6HTF1	Conserved hypothetical protein HCDG_09482
F0U7X7	Conserved hypothetical protein HCEG_00161
F0U507	Conserved hypothetical protein HCEG_01412
F0U516	Conserved hypothetical protein HCEG_01421
F0U666	Conserved hypothetical protein HCEG_01611
F0UII7	Conserved hypothetical protein HCEG_04807
F0ULF0	Conserved hypothetical protein HCEG_05435
F0UME2	Conserved hypothetical protein HCEG_06501
F0UMY8	Conserved hypothetical protein HCEG_06670
F0URH9	Conserved hypothetical protein HCEG_07721
F0USW1	Conserved hypothetical protein HCEG_08203
C0NC86	COPII coated vesicle component Erv46
F0UPL0	COPII-coated vesicle protein
C0NWB4	Curved DNA-binding protein
A6R882	Curved DNA-binding protein 42 kDa protein
C6H812	Cytochrome b-c1 complex subunit 7
A6QU87	Cytochrome b-c1 complex subunit Rieske, mitochondrial
C0NTD8	Cytochrome c oxidase polypeptide VI
C0P1G5	Cytochrome c oxidase subunit 2
C0P0B5	Cytochrome c oxidase subunit V
C0NQD9	Cytochrome c1
A6R236	Cytosolic large ribosomal subunit protein L30
C6H6L8	Cytosolic large ribosomal subunit protein L7A
C0NIZ0	DEAD_2 domain-containing protein
C6H907	DEAD_2 protein
F0UAE5	DEAD-box protein
C0NJM2	Dihydrolipoamide acetyltransferase component of pyruvate dehydrogenase complex
C6HP67	Dihydrolipoamide S-succinyltransferase
C0NZ91	Dihydrolipoamide succinyltransferase
A6R1L4	Dihydrolipoyllysine-residue succinyltransferase component of 2-oxoglutarate dehydrogenase complex, mitochondrial
C0NS16	DnaK-type molecular chaperone bipA
A6R221	Dolichyl-diphosphooligosaccharide--protein glycosyltransferase subunit 1
C0NTZ9	DUF1620 domain-containing protein
Q1HRW5	ELI-ag1-like protein
A6RGN1	Elongation factor 1 alpha
C0NSN4	Elongation factor 2
C6HLQ7	Endoplasmic reticulum-Golgi intermediate compartment protein
F0UW98	Endosomal P24A protein
C0NAB0	Enolase
C0P0E9	ER lumen protein-retaining receptor
C0NKJ1	ER-derived vesicles protein ERV29
C0NXA3	Eukaryotic translation initiation factor 3 subunit C
C0NRJ7	Fasciclin domain family
A6RDC9	Fatty acid synthase beta subunit dehydratase
A6RDC8	Fatty acid synthase subunit alpha
C6HIY5	F-box protein
C0NQI2	Fumarate reductase flavoprotein subunit
F0UTI0	Fumarate reductase m1
C0P131	Glucosamine-fructose-6-phosphate aminotransferase
C0NKS4	Glutaminase
C6HB15	Glutaminase A
F0UW28	Glutamine fructose-6-phosphate amidotransferase
C0NRN1	Glyceraldehyde-3-phosphate dehydrogenase
A6QZ01	Guanine nucleotide-binding protein beta subunit
C0NH00	H/ACA ribonucleoprotein complex subunit
C0NBV8	Heat shock protein
C0NEX3	Histidine biosynthesis trifunctional protein
A6QYA0	Histidinol dehydrogenase
A6R1L6	Histone H2A
A6R1L7	Histone H2B
C0NL60	Histone H3
A6R2M7	Histone H4
C0P0B3	Hsp60-like protein
A6QUU8	Hypothetical protein HCAG_01154
C0NIN0	Hypothetical protein HCBG_02287
C0NGJ6	Hypothetical protein HCBG_02468
C6H802	Hypothetical protein HCDG_01563
A6RCY5	IMP-specific 5'-nucleotidase 1
A6QSH3	Kinase
C6HH09	Kinesin family protein
F0US05	Kinesin-like protein bimC
C0NDC6	Large subunit ribosomal protein L3
C0ND98	Lectin
C0NTX9	L-xylulose reductase
C0NZ92	LYR family protein
C0NFZ1	Mannosyltransferase
F0U656	MFS multidrug transporter
A6R6X1	Mitochondrial 37S ribosomal protein MRP2
A6RDS4	Mitochondrial 37S ribosomal protein MRPS8
C0NGW1	Mitochondrial 40S ribosomal protein MRP2
F0UH16	Mitochondrial 54S ribosomal protein MRPL51
A6QTR8	Mitochondrial 54S ribosomal protein YmL3
C0NFU0	Mitochondrial 54S ribosomal protein YmL41
C0NP84	Mitochondrial ATP synthase subunit F
C0P087	Mitochondrial DNA replication protein
A6QUB7	Mitochondrial F1F0 ATP synthase subunit F
C6HMG1	Mitochondrial F1F0 ATP synthase subunit F Atp17
C6HPG4	Mitochondrial large ribosomal subunit
C6H278	Mitochondrial peroxiredoxin PRX1
C0NAR6	Mitochondrial phosphate carrier protein
A6R3W7	Mitochondrial phosphate carrier protein 2
A6QY85	Mitochondrial processing peptidase beta subunit
C0NEW1	Mitochondrial processing peptidase subunit
F0UC56	Mitochondrial ribosomal protein DAP3
C0NFC5	Mitochondrial ribosomal protein subunit L51
C0NNV4	Mitochondrial ribosome small subunit component S19
C0NBJ8	mRNA splicing protein PRP8
A6RAD7	N-acetyl-beta-glucosaminidase
C0NR32	NADH dehydrogenase [ubiquinone] 1 alpha subcomplex subunit
C0NJX0	NADH dehydrogenase [ubiquinone] flavoprotein 1, mitochondrial
C0NBP9	NADH dehydrogenase I
C0NCE5	NADH-cytochrome b5 reductase
C6HAP9	NADH-cytochrome b-5 reductase (Fragment)
A6R1T7	NADH-cytochrome b5 reductase 2
C0P0E1	NADH-ubiquinone oxidoreductase
C6HR60	NADH-ubiquinone oxidoreductase 12 kDa subunit
C6HMG0	NADH-ubiquinone oxidoreductase 21 kDa subunit
A6QUB6	NADH-ubiquinone oxidoreductase 21 kDa subunit, mitochondrial
C6H6X3	NADH-ubiquinone oxidoreductase 213 kDa subunit
C6HJG9	NADH-ubiquinone oxidoreductase 24 kDa subunit
C6H6P9	NADH-ubiquinone oxidoreductase 40 kDa subunit
A6R4R5	NADH-ubiquinone oxidoreductase 49 kDa subunit, mitochondrial
C6HGM0	NADH-ubiquinone oxidoreductase 78 kDa subunit
C0P1G9	NADH-ubiquinone oxidoreductase chain 3
C6H3S2	NADH-ubiquinone oxidoreductase kD subunit
C6HIA2	NADH-ubiquinone oxidoreductase kDa subunit
C6HQU6	NAM9+ protein
A6R5Z3	Nascent polypeptide-associated complex subunit beta
C6HLZ8	Nipsnap family protein
F0UP30	Nuclear condensin complex subunit 3
C0NTN5	Nucleoside diphosphate kinase
A6R0E9	Nucleosome assembly protein Nap1
F0U588	Outer mitochondrial membrane porin protein
C0NIQ1	Outer mitochondrial membrane protein porin
C0NL76	Peptidase family M13 protein
C0NIA4	Peroxin 11
F0UFL7	Phosphoglucomutase
F0UM41	Phosphoinositide 3-kinase
A6R9I6	Plasma membrane ATPase
C0P192	Polysaccharide deacetylase
A6QTU4	Predicted protein HCAG_00800
A6QU02	Predicted protein HCAG_00858
A6R0F1	Predicted protein HCAG_03108
A6R3M4	Predicted protein HCAG_04232
A6R533	Predicted protein HCAG_04741
C0NE88	Predicted protein HCBG_02181
C0NKK7	Predicted protein HCBG_03687
C6HG95	Predicted protein HCDG_05435
F0UD06	Predicted protein HCEG_02647
F0UG05	Predicted protein HCEG_04269
F0UV12	Predicted protein HCEG_08954
C6HT16	Pre-mRNA splicing factor
F0UQL8	Processing/enhancing protein
C0NCN3	Prohibitin
A6R225	Prohibitin-2
C6HSF6	Proteasome component
C0P147	Proteasome component C5
A6R7Q1	Proteasome component PRE3
C0NAC2	Proteasome component PUP3
C0NDE1	Proteasome endopeptidase complex
C0NLB3	Proteasome subunit alpha type
C0P150	Proteasome subunit beta
C0NRU2	Proteasome subunit beta type
A6R041	Protein transport protein SEC61 alpha subunit
C0NE03	Protein transporter SEC61 alpha subunit
C0NPA5	Pumilio domain-containing protein c
Q1HRW7	Putative high affinity copper transporter
F0UEG3	Putative small nuclear ribonucleoprotein
A6R3L9	pyruvate carboxylase
C0NIX2	Rho GTPase Rho1
C6H896	Rho1 GTPase
F0UCG4	Ribose-phosphate pyrophosphokinase
C0NDH6	Ribose-phosphate pyrophosphokinase 1
A6QWB0	Ribose-phosphate pyrophosphokinase 3
C0NCP4	Ribosomal L10 protein
A6REK7	Ribosomal protein L13
C0NHN4	Ribosomal protein L14
A6R1V3	Ribosomal protein L15
C0NMA2	Ribosomal protein L19
A6R1J7	Ribosomal protein L22
A6R6D4	Ribosomal protein L31e
C6H9U0	Ribosomal protein L34 protein
F0U7R8	Ribosomal protein L37
F0UB50	Ribosomal protein L37a
A6R4V4	Ribosomal protein S13
F0UDL7	Ribosomal protein S15
A6R4L7	Ribosomal protein S16
F0URZ8	Ribosomal protein S2
C0NQV8	Ribosomal protein S23
A6RE96	Ribosomal protein S5
A6REK8	Ribosomal protein S9
C0NLR4	Ribosomal protein Srp1
C6HP82	Ribosomal protein YmL20
C0P069	Ribosome biogenesis protein BRX1
C6HMI5	RNA binding protein Jsn1
C0NTU6	RNase III domain-containing protein
C0NMB4	Serine hydroxymethyltransferase
F0ULK1	Serine proteinase
C6H2B4	Short chain dehydrogenase/reductase
C0NFM9	Small G-beta protein GPB
C6HQC2	Small nuclear ribonucleoprotein
C0NPI9	small nuclear ribonucleoprotein F
C0NCQ1	Small nuclear ribonucleoprotein Sm D1
A6QYU6	Small nuclear ribonucleoprotein Sm D2
C0NY06	Small nuclear ribonucleoprotein Sm D3
A6QZH3	Small nuclear ribonucleoprotein SmG
C6HSY9	SNARE SEC61 alpha subunit
A6QTC0	Sorbitol utilization protein SOU1
F0UD48	Sortilin
C0NYM0	Sphingolipid long chain base-responsive protein PIL1
F0UF36	SsDNA binding protein
C0NJH7	Stomatin family protein
A6RBH9	Succinate dehydrogenase [ubiquinone] flavoprotein subunit, mitochondrial
C0NQC7	Succinate dehydrogenase [ubiquinone] iron-sulfur subunit, mitochondrial
C0NTU4	Succinate dehydrogenase cytochrome b560 subunit
C0NQE7	SWIB/MDM2 domain-containing protein
C0NMI3	Thiol-specific antioxidant
A6R8J6	Transcription factor tfiiib complex subunit brf1
F0UP67	Transcriptional activator leucine zipper
C0NFK1	Transmembrane protein
C0NFD3	Triosephosphate isomerase
C0NNR3	U5 small nuclear ribonucleoprotein component
F0UVL9	Ubiquinol-cytochrome c reductase complex
C0NHZ3	Ubiquinol-cytochrome c reductase complex ubiquinone-binding protein
C0NJT9	Ubiquinol-cytochrome c reductase subunit 6
C0NW74	Ubiquitin
C6HC36	Ubiquitin/79aa fusion protein
C0NB93	UTP-glucose-1-phosphate uridylyltransferase
C0NKP8	Vacuolar protein sorting/targeting protein 10
C6HEQ0	Vacuolar serine protease
C0NUB6	Vacuolar sorting receptor
C6HP08	V-type proton ATPase subunit
A6QW28	V-type proton ATPase subunit a
F0UAH0	ZZ type zinc finger domain-containing protein
a Protein entry was based on UniProt database (www.uniprot.org).

## Sheet: Table S3
Table S3. Proteins from Histoplasma capsulatum yeast protein extract recognized by the serum pool of normal healthy sera.
Protein entry a	Protein name a
C0P040	30S ribosomal protein S10
F0UUV5	30S ribosomal protein S7
C6H2X8	37S ribosomal protein Rsm24
C0NNH6	37S ribosomal protein S16
C0NZV6	37S ribosomal protein S9
A6R9C3	40S ribosomal protein S1
A6RDR5	40S ribosomal protein S11
C0NUE8	40S ribosomal protein S12
C0NBT1	40S ribosomal protein S13
C0NVE4	40S ribosomal protein S14
C0NVE6	40S ribosomal protein S16
A6RGA1	40S ribosomal protein S18
C0NEP3	40S ribosomal protein S22
C6H1S8	40S ribosomal protein S3
A6RC79	40S ribosomal protein S4
A6QYH3	40S ribosomal protein S5
C0NF40	40S ribosomal protein S5A
A6R8H2	40S ribosomal protein S7
C0NST9	40S ribosomal protein S8
F0URM8	40S ribosomal protein S9
F0USJ3	60S ribosomal protein
A6R237	60S ribosomal protein L10-B
C0NAG5	60S ribosomal protein L11
A6R3M3	60S ribosomal protein L11-1
A6RDK0	60S ribosomal protein L13
A6R642	60S ribosomal protein L14
C0NEU1	60S ribosomal protein L17
C0NMF6	60S ribosomal protein L18
A6RCV5	60S ribosomal protein L18-B
A6RFU9	60S ribosomal protein L2
A6R1T5	60S ribosomal protein L20
C0NI22	60S ribosomal protein L22
C0NE75	60S ribosomal protein L23
C0NRH5	60S ribosomal protein L24
C0NSX6	60S ribosomal protein L26
C0NV31	60S ribosomal protein L27
C0NHE0	60S ribosomal protein L31E
C0NWM3	60S ribosomal protein L32
C0NAQ6	60S ribosomal protein L33
C0NBJ7	60S ribosomal protein L34B
C0NJ90	60S ribosomal protein L35
A6R3H7	60S ribosomal protein L36
C0NWA6	60S ribosomal protein L37A
A6R893	60S ribosomal protein L43
A6RCN9	60S ribosomal protein L44
A6QSW2	60S ribosomal protein L4-A
A6QWN6	60S ribosomal protein L6
A6RGE0	60S ribosomal protein L7
C0NHA4	60S ribosomal protein L7A
C0NQR6	60S ribosomal protein L9B
C6H4P0	Aconitate hydratase
P53455	Actin
C0NUF9	ADP,ATP carrier protein
A6RFF1	Aldehyde dehydrogenase
A6R263	Alternative oxidase
Q9Y711	Alternative oxidase, mitochondrial
C0NB88	Amidase
C0NU76	AMP dependent synthetase and ligase
A6QRM9	Arginase
C0NG75	ATP synthase subunit alpha
C0P0C5	ATP synthase subunit beta
F0UVB2	ATP synthase subunit D
F0UP51	ATP-dependent DNA ligase
C6HFF1	ATP-dependent DNA ligase domain-containing protein
C0NSG3	Beta-hexosaminidase
C0NWQ3	C2H2 zinc finger domain-containing protein
C6HBK3	C2H2 zinc finger protein
C0NT81	Condensin subunit
A6QUJ3	Conserved hypothetical protein HCAG_01049
C0NM92	Conserved hypothetical protein HCBG_04622
C0NNQ6	Conserved hypothetical protein HCBG_04786
C0NRC2	Conserved hypothetical protein HCBG_05552
C0NVM7	Conserved hypothetical protein HCBG_07207
C6H4Y3	Conserved hypothetical protein HCDG_00304
F0U960	Conserved hypothetical protein HCDG_01216
C6HIX8	Conserved hypothetical protein HCDG_06012
C6HTC3	Conserved hypothetical protein HCDG_09454
C6HTF1	Conserved hypothetical protein HCDG_09482
F0UII7	Conserved hypothetical protein HCEG_04807
F0USW1	Conserved hypothetical protein HCEG_08203
C0NWB4	Curved DNA-binding protein
A6R882	Curved DNA-binding protein 42 kDa protein
C0P1G5	Cytochrome c oxidase subunit 2
A6R236	Cytosolic large ribosomal subunit protein L30
C6H6L8	Cytosolic large ribosomal subunit protein L7A
C0NIZ0	DEAD_2 domain-containing protein
C6H907	DEAD_2 protein
F0UAE5	DEAD-box protein
C0NJM2	Dihydrolipoamide acetyltransferase component of pyruvate dehydrogenase complex
C6HP67	Dihydrolipoamide S-succinyltransferase
C0NZ91	Dihydrolipoamide succinyltransferase
A6R1L4	Dihydrolipoyllysine-residue succinyltransferase component of 2-oxoglutarate dehydrogenase complex, mitochondrial
C6HJH1	DUF814 domain-containing protein
A6RGN1	Elongation factor 1-alpha
C0NXA3	Eukaryotic translation initiation factor 3 subunit C
C0NRJ7	Fasciclin domain family
C0NKS4	Glutaminase
A6R9H0	Heat shock protein 60, mitochondrial
A6R1L6	Histone H2A
A6R1L7	Histone H2B
C0NL60	Histone H3
A6R2M7	Histone H4
C0P0B3	Hsp60-like protein
A6QS66	Hypothetical protein HCAG_00222
A6R4T2	Hypothetical protein HCAG_04640
A6RBH6	Hypothetical protein HCAG_06314
C0NDC6	Large subunit ribosomal protein L3
C0NLK8	LIM domain-containing protein
C0NTX9	L-xylulose reductase
A6R9B6	Mitochondrial 37S ribosomal protein RSM10
F0U636	Mitochondrial 37S ribosomal protein RSM27
C6HP82	Mitochondrial 54S ribosomal protein YmL20
C0NP84	Mitochondrial ATP synthase subunit F
A6QUB7	Mitochondrial F1F0 ATP synthase subunit F
C6HMG1	Mitochondrial F1F0 ATP synthase subunit F Atp17
A6QY85	Mitochondrial processing peptidase beta subunit
C0NEW1	Mitochondrial processing peptidase subunit
F0UC56	Mitochondrial ribosomal protein DAP3
A6RAD7	N-acetyl-beta-glucosaminidase
C0P0E1	NADH-ubiquinone oxidoreductase
C0NHN5	Nascent polypeptide-associated complex subunit alpha
A6R5Z3	Nascent polypeptide-associated complex subunit beta
C0NZ44	NmrA-like family domain-containing protein
F0UP30	Nuclear condensin complex subunit 3
C6HL93	Oligopeptidase
F0U588	Outer mitochondrial membrane porin protein
C0NIQ1	Outer mitochondrial membrane protein porin
B2KWH9	Oxidoreductase
A6R9I6	Plasma membrane ATPase
F0UV12	Predicted protein HCEG_08954
F0UED3	Pre-mRNA-splicing factor
F0UQL8	Processing/enhancing protein
C0NPA5	Pumilio domain-containing protein c
F0UEG3	Putative small nuclear ribonucleoprotein
C0NCP4	Ribosomal L10 protein
C0NHN4	Ribosomal protein L14
A6R1V3	Ribosomal protein L15
C0NMA2	Ribosomal protein L19
A6R1J7	Ribosomal protein L22
A6R6D4	Ribosomal protein L31e
A6R7Y4	Ribosomal protein L32
C6H9U0	Ribosomal protein L34 protein
F0U7R8	Ribosomal protein L37
F0UB50	Ribosomal protein L37a
A6R4V4	Ribosomal protein S13
A6R4L7	Ribosomal protein S16
F0URZ8	Ribosomal protein S2
A6RE96	Ribosomal protein S5
A6REK8	Ribosomal protein S9
C0NLR4	Ribosomal protein Srp1
C0NQT5	Ribosome biogenesis protein ERB1
C6H775	RNA binding domain-containing protein
C6HMI5	RNA binding protein Jsn1
C0NMB4	Serine hydroxymethyltransferase
C0NY23	Signal recognition particle subunit SRP72
C6HQC2	Small nuclear ribonucleoprotein
C0NPI9	Small nuclear ribonucleoprotein F
A6QYU6	Small nuclear ribonucleoprotein Sm D2
C0NY06	Small nuclear ribonucleoprotein Sm D3
A6QZH3	Small nuclear ribonucleoprotein SmG
A6QTC0	Sorbitol utilization protein SOU1
C0NYM0	Sphingolipid long chain base-responsive protein PIL1
F0UF36	SsDNA binding protein
C0NJT9	Ubiquinol-cytochrome c reductase subunit 6
C0NB93	UTP-glucose-1-phosphate uridylyltransferase
a Protein entry was based on UniProt database (www.uniprot.org).

## Sheet: Table S4
Table S4. Proteins from Histoplasma capsulatum yeast protein extract recognized by the mock PBS control.
Protein entry a	Protein name a
A6REZ5	Actin
C0NYN0	AP-2 complex subunit alpha
C0NG75	ATP synthase subunit alpha
A6R5T3	Conserved hypothetical protein HCAG_04991
A6R7C7	Conserved hypothetical protein HCAG_05535
A6RBE8	Conserved hypothetical protein HCAG_06286
A6RCB9	Conserved hypothetical protein HCAG_07277
A6RH90	Conserved hypothetical protein HCAG_09007
C0NLW1	Conserved hypothetical protein HCBG_04491
C0NU23	Conserved hypothetical protein HCBG_06854
F0U8Z5	Conserved hypothetical protein HCEG_00359
F0UEV4	Conserved hypothetical protein HCEG_04049
F0UVP0	Conserved hypothetical protein HCEG_09182
A6RG90	Deoxyhypusine synthase
F0UPA0	DUF1212 domain-containing protein
F0UP83	Dynactin Arp1 p25 subunit
C0P0B3	Heat shock protein 60
P50142	Heat shock protein 60, mitochondrial
F0UQP8	Hsp60-like protein
C6H8B5	Ima1_N domain-containing protein
C6H1H3	Iterative type I polyketide synthase
C0NEG4	Macro domain-containing protein
C0NF65	Mapkkk cascade protein kinase regulator ste50
C0NSG3	N-acetyl-beta-glucosaminidase
F0UQL0	O-acetylhomoserine sulfhydrylase
C6HA79	Periodic tryptophan protein
C6H2L9	Polyubiquitin
A6R8Q0	Rav1p_C domain-containing protein
C0NAA4	Sarcoplasmic/endoplasmic reticulum calcium ATPase
F0UMB7	SPX domain-containing protein
C6H2Y9	Telomere length regulator protein
F0U9Y9	tRNA (cytosine-5-)-methyltransferase NCL1
F0U9H5	tRNA splicing 2' phosphotransferase
C6H534	Ubiquinone biosynthesis protein
C0NMY3	Ubiquitin
C6HG20	Vacuolar triacylglycerol lipase
C0NSF5	WD domain-containing protein
C6HPV8	WHIM1 domain-containing protein
a Protein entry was based on UniProt database (www.uniprot.org).

## Sheet: Table S5
Table S5. Potential antigenic proteins identified from the protein extract of the yeast of Histoplasma capsulatum by immunoproteomics.
Protein entry a	HPM b	HET c	NHS d	CON e
C0P040	30s ribosomal protein s10	X	X	-
F0UUV5	30s ribosomal protein s7	X	X	-
C6H2X8	37s ribosomal protein rsm24	X	X	-
C0NNU6	37s ribosomal protein s5	X	-	-
C0NZV6	37s ribosomal protein s9	X	X	-
A6RDL7	3-hydroxybutyryl-CoA dehydrogenase	X	-	-
A6R9C3	40s ribosomal protein s1	X	X	-
A6RDR5	40s ribosomal protein s11	X	X	-
C0NBT1	40s ribosomal protein s13	X	X	-
C0NVE6	40s ribosomal protein s16	X	X	-
A6RGA1	40s ribosomal protein s18	X	X	-
C6H1S8	40s ribosomal protein s3	X	X	-
A6RC79	40s ribosomal protein s4	X	X	-
A6QYH3	40s ribosomal protein s5	X	X	-
C0NF40	40s ribosomal protein s5a	X	X	-
A6R8H2	40s ribosomal protein s7	X	X	-
C0NST9	40s ribosomal protein s8	X	X	-
F0URM8	40s ribosomal protein s9	X	X	-
F0UH89	50s ribosomal protein	X	-	-
F0USJ3	60s ribosomal protein	X	X	-
A6R237	60s ribosomal protein l10-b	X	X	-
C0NAG5	60s ribosomal protein l11	X	X	-
A6RDK0	60s ribosomal protein l13	X	X	-
C0NEU1	60s ribosomal protein l17	X	X	-
C0NMF6	60s ribosomal protein l18	X	X	-
A6RCV5	60s ribosomal protein l18-b	X	X	-
A6RFU9	60s ribosomal protein l2	X	X	-
A6R1T5	60s ribosomal protein l20	X	X	-
C0NE75	60s ribosomal protein l23	X	X	-
C0NRH5	60s ribosomal protein l24	X	X	-
C0NV31	60s ribosomal protein l27	X	X	-
C0NNL2	60s ribosomal protein l3	X	-	-
C0NHE0	60s ribosomal protein l31e	X	X	-
C0NWM3	60s ribosomal protein l32	X	X	-
C0NAQ6	60s ribosomal protein l33	X	X	-
C0NBJ7	60s ribosomal protein l34b	X	X	-
C0NJ90	60s ribosomal protein l35	X	X	-
A6R3H7	60s ribosomal protein l36	X	X	-
C0NWA6	60s ribosomal protein l37a	X	X	-
A6R893	60s ribosomal protein l43	X	X	-
A6RCN9	60s ribosomal protein l44	X	X	-
A6QWN6	60s ribosomal protein l6	X	X	-
A6RGE0	60s ribosomal protein l7	X	X	-
C0NHA4	60s ribosomal protein l7a	X	X	-
C0NQR6	60s ribosomal protein l9b	X	X	-
C6H4P0	Aconitate hydratase	X	X	-
C0NUF9	ADP, ATP carrier protein	X	X	-
A6RFF1	Aldehyde dehydrogenase	X	X	-
A6R263	Alternative oxidase	X	X	-
Q9Y711	Alternative oxidase, mitochondrial	X	X	-
C0NB88	Amidase	X	X	-
C0NU76	Amp dependent synthetase and ligase	X	X	-
A6QRM9	Arginase	X	X	-
A6QZM1	ATP synthase subunit 4	X	-	-
C0NG75	ATP synthase subunit alpha	X	X	X
C0P0C5	ATP synthase subunit beta	X	X	-
F0UVB2	ATP synthase subunit d	X	X	-
F0UP51	ATP-dependent dna ligase	X	X	-
C6HFF1	ATP-dependent dna ligase domain-containing protein	X	X	-
C0NVF6	Catalase	-	-	-
Q9Y7C2	Catalase B	-	-	-
C0NM92	Conserved hypothetical protein HCBG_04622	-	X	-
C0NNQ6	Conserved hypothetical protein HCBG_04786	X	X	-
C0NVA1	Conserved hypothetical protein HCBG_07081	X	-	-
C6H4Y3	Conserved hypothetical protein HCDG_00304	X	X	-
F0U960	Conserved hypothetical protein HCDG_01216	-	X	-
C6HHJ5	Conserved hypothetical protein HCDG_05676	X	-	-
C6HTC3	Conserved hypothetical protein HCDG_09454	-	X	-
F0UII7	Conserved hypothetical protein HCEG_04807	X	X	-
F0URH9	Conserved hypothetical protein HCEG_07721	X	-	-
A6QU87	Cytochrome b-c1 complex subunit rieske, mitochondrial	X	-	-
C0P1G5	Cytochrome c oxidase subunit 2	X	X	-
A6R236	Cytosolic large ribosomal subunit protein l30	X	X	-
C0NIZ0	Dead_2 domain-containing protein	X	X	-
C6H907	Dead_2 protein	X	X	-
F0UAE5	Dead-box protein	X	X	-
C6HP67	Dihydrolipoamide s-succinyltransferase	X	X	-
C0NZ91	Dihydrolipoamide succinyltransferase	X	X	-
A6RGN1	Elongation factor 1 alpha	X	X	-
C0NKS4	Glutaminase	X	X	-
A6R1L6	Histone H2a	X	X	-
A6R1L7	Histone H2b	X	X	-
A6R2M7	Histone H4	X	X	-
C0NDC6	Large subunit ribosomal protein l3	X	X	-
C0NTX9	L-xylulose reductase	X	X	-
C0NZ92	Lyr family protein	X	-	-
O13373	M antigen	-	-	-
F0U636	Mitochondrial 37s ribosomal protein rsm27	-	X	-
F0UH16	Mitochondrial 54s ribosomal protein mrpl51	X	-	-
C0NP84	Mitochondrial atp synthase subunit f	X	X	-
A6QUB7	Mitochondrial f1f0 atp synthase subunit f	X	X	-
C6HMG1	Mitochondrial flavo0 atp synthase subunit f atp17	X	X	-
A6QY85	Mitochondrial processing peptidase beta subunit	X	X	-
C0NEW1	Mitochondrial processing peptidase subunit	X	X	-
F0UC56	Mitochondrial ribosomal protein dap3	X	X	-
C0NFC5	Mitochondrial ribosomal protein subunit l51	X	-	-
C0NBJ8	Mrna splicing protein prp8	X	-	-
C0P0E1	Nadh-ubiquinone oxidoreductase	X	X	-
A6R5Z3	Nascent polypeptide-associated complex subunit beta	X	X	-
F0U588	Outer mitochondrial membrane porin protein	X	X	-
C0NIQ1	Outer mitochondrial membrane protein porin	X	X	-
A6R9I6	Plasma membrane atpase	X	X	-
A6QU02	Predicted protein HCAG_00858	X	-	-
F0UQL8	Processing/enhancing protein	X	X	-
F0UCG4	Ribose-phosphate pyrophosphokinase	X	-	-
C0NCP4	Ribosomal l10 protein	X	X	-
C0NHN4	Ribosomal protein l14	X	X	-
A6R1V3	Ribosomal protein l15	X	X	-
A6R1J7	Ribosomal protein l22	X	X	-
A6R6D4	Ribosomal protein l31e	X	X	-
C6H9U0	Ribosomal protein l34 protein	X	X	-
F0U7R8	Ribosomal protein l37	X	X	-
F0UB50	Ribosomal protein l37a	X	X	-
A6R4V4	Ribosomal protein s13	X	X	-
A6R4L7	Ribosomal protein s16	X	X	-
F0URZ8	Ribosomal protein s2	X	X	-
A6RE96	Ribosomal protein s5	X	X	-
A6REK8	Ribosomal protein s9	X	X	-
C0NLR4	Ribosomal protein srp1	X	X	-
C6HP82	Ribosomal protein yml20	X	-	-
C0NTU6	Rnase iii domain-containing protein	X	-	-
C0NMB4	Serine hydroxymethyltransferase	X	X	-
C6HQC2	Small nuclear ribonucleoprotein	X	X	-
A6QYU6	Small nuclear ribonucleoprotein sm d2	X	X	-
C0NY06	Small nuclear ribonucleoprotein sm d3	X	X	-
A6QTC0	Sorbitol utilization protein sou1	X	X	-
F0UF36	Ssdna binding protein	X	X	-
A6RBH9	Succinate dehydrogenase [ubiquinone] flavoprotein subunit, mitochondrial	X	-	-
C0NNR3	U5 small nuclear ribonucleoprotein component	X	-	-
A6QW28	V-type proton atpase subunit a	X	-	-
Q8J1T0	Yeast phase specific protein	-	-	-
Q00950	YPS-3 protein	-	-	-
a UniProtKB database (www.uniprot.org).
b Identified protein, present in all 3 biological replicates, that interacted with pooled sera from patients with histoplasmosis.
c Identified protein, present in at least 1 biological replicate, that interacted with pooled sera from patients with other fungal infections and tuberculosis.
d Identified protein, present in at least 1 biological replicate, that interacted with pooled normal healthy sera.
e Identified protein, present in at least 1 biological replicate, that interacted with the chromatografic matrix (control experiment with PBS).
In bold with a blue background are identified proteins considered to be specific to pooled sera from patients with proven histoplasmosis.

## Sheet: Table S6
Table S6. Functional classification and subcellular localization of identified proteins against serum pool from the histoplasmosis patients
Protein entry a	Protein name	Biological function b	Location c	EV d
C0P040	30s ribosomal protein s10	Protein synthesis	Mitochondrial	No
F0UUV5	30s ribosomal protein s7	Protein synthesis	Mitochondrial	No
C6H2X8	37s ribosomal protein rsm24	Protein synthesis	Mitochondrial	No
C0NNU6	37s ribosomal protein s5	Protein synthesis	Mitochondrial	No
C0NZV6	37s ribosomal protein s9	Protein synthesis	Mitochondrial	No
A6RDL7	3-hydroxybutyryl-CoA dehydrogenase	Fatty acid metabolic process	Mitochondrial	Yes
A6R9C3	40s ribosomal protein s1	Translation	Nuclear	Yes
A6RDR5	40s ribosomal protein s11	Translation	Mitochondrial	Yes
C0NBT1	40s ribosomal protein s13	Translation	Mitochondrial	Yes
C0NVE6	40s ribosomal protein s16	Translation	Mitochondrial	Yes
A6RGA1	40s ribosomal protein s18	Translation	Mitochondrial	Yes
C6H1S8	40s ribosomal protein s3	Translation	Nuclear	Yes
A6RC79	40s ribosomal protein s4	Translation	Mitochondrial	Yes
A6QYH3	40s ribosomal protein s5	Protein synthesis	Mitochondrial	Yes
C0NF40	40s ribosomal protein s5a	Translation	Mitochondrial	Yes
A6R8H2	40s ribosomal protein s7	Translation	Mitochondrial	Yes
C0NST9	40s ribosomal protein s8	Translation	Nuclear	Yes
F0URM8	40s ribosomal protein s9	Translation	Mitochondrial	Yes
F0UH89	50s ribosomal protein	Translation	Peroxisomal	No
F0USJ3	60s ribosomal protein	Translation	Mitochondrial	Yes
A6R237	60s ribosomal protein l10-b	Protein synthesis	Nuclear	Yes
C0NAG5	60s ribosomal protein l11	Translation	Mitochondrial	Yes
A6RDK0	60s ribosomal protein l13	Translation	Nuclear	Yes
C0NEU1	60s ribosomal protein l17	Translation	Mitochondrial	Yes
C0NMF6	60s ribosomal protein l18	Translation	Mitochondrial	Yes
A6RCV5	60s ribosomal protein l18-b	Translation	Mitochondrial	Yes
A6RFU9	60s ribosomal protein l2	Translation	Mitochondrial	Yes
A6R1T5	60s ribosomal protein l20	Translation	Nuclear	Yes
C0NE75	60s ribosomal protein l23	Translation	Mitochondrial	Yes
C0NRH5	60s ribosomal protein l24	Protein synthesis	Mitochondrial	Yes
C0NV31	60s ribosomal protein l27	Translation	Mitochondrial	Yes
C0NNL2	60s ribosomal protein l3	RNA processing	Mitochondrial	Yes
C0NHE0	60s ribosomal protein l31e	Translation	Mitochondrial	Yes
C0NWM3	60s ribosomal protein l32	Translation	Mitochondrial	Yes
C0NAQ6	60s ribosomal protein l33	Translation	Mitochondrial	Yes
C0NBJ7	60s ribosomal protein l34b	Translation	Mitochondrial	Yes
C0NJ90	60s ribosomal protein l35	Translation	Nuclear	Yes
A6R3H7	60s ribosomal protein l36	Translation	Mitochondrial	Yes
C0NWA6	60s ribosomal protein l37a	Translation	Mitochondrial	Yes
A6R893	60s ribosomal protein l43	Translation	Mitochondrial	Yes
A6RCN9	60s ribosomal protein l44	Translation	Mitochondrial	No
A6QWN6	60s ribosomal protein l6	Translation	Nuclear	No
A6RGE0	60s ribosomal protein l7	Protein synthesis	Mitochondrial	Yes
C0NHA4	60s ribosomal protein l7a	Protein transport	Mitochondrial	Yes
C0NQR6	60s ribosomal protein l9b	Translation	Mitochondrial	Yes
C6H4P0	Aconitate hydratase	Tricarboxylic-acid pathway	Mitochondrial	Yes
C0NUF9	ADP, ATP carrier protein	ATP transmembrane transporter activity	Mitochondrial	Yes
A6RFF1	Aldehyde dehydrogenase	Glycolysis and gluconeogenesis	Cytoplasmic	Yes
A6R263	Alternative oxidase	Electron transport	Mitochondrial	No
Q9Y711	Alternative oxidase, mitochondrial	Electron transport	Mitochondrial	No
C0NB88	Amidase	Arginine and proline metabolism	Mitochondrial	Yes
C0NU76	Amp dependent synthetase and ligase	Translation	Cytoplasmic	Yes
A6QRM9	Arginase	Arginine metabolism	Mitochondrial	Yes
A6QZM1	ATP synthase subunit 4	ATP synthesis coupled proton transport	Mitochondrial	Yes
C0NG75	ATP synthase subunit alpha	ATP synthesis coupled proton transport	Mitochondrial	Yes
C0P0C5	ATP synthase subunit beta	ATP synthesis coupled proton transport	Mitochondrial	Yes
F0UVB2	ATP synthase subunit d	ATP synthesis coupled proton transport	Nuclear	Yes
F0UP51	ATP-dependent dna ligase	DNA recombination	Nuclear	No
C6HFF1	ATP-dependent dna ligase domain-containing protein	DNA recombination	Nuclear	No
C0NVF6	Catalase	Response to oxidative stress	Nuclear	Yes
Q9Y7C2	Catalase B	Response to oxidative stress	Extracellular	Yes
C0NM92	Conserved hypothetical protein (hcbg_04622)	Unknown	Nuclear	No
C0NNQ6	Conserved hypothetical protein (hcbg_04786)	Unknown	Peroxisomal	No
C0NVA1	Conserved hypothetical protein (hcbg_07081)	Unknown	Mitochondrial	No
C6H4Y3	Conserved hypothetical protein (hcdg_00304)	Unknown	Mitochondrial	No
F0U960	Conserved hypothetical protein (hcdg_01216)	Unknown	Nuclear	No
C6HHJ5	Conserved hypothetical protein (hcdg_05676)	Unknown	Mitochondrial	No
C6HTC3	Conserved hypothetical protein (hcdg_09454)	Unknown	Nuclear	No
F0UII7	Conserved hypothetical protein (hceg_04807)	Unknown	Mitochondrial	No
F0URH9	Conserved hypothetical protein (hceg_07721)	Unknown	Mitochondrial	No
A6QU87	Cytochrome b-c1 complex subunit rieske, mitochondrial	Electron transport	Mitochondrial	Yes
C0P1G5	Cytochrome c oxidase subunit 2	Electron transport	Mitochondrial	Yes
A6R236	Cytosolic large ribosomal subunit protein l30	Protein transport	Mitochondrial	No
C0NIZ0	Dead_2 domain-containing protein	Translation	Mitochondrial	Yes
C6H907	Dead_2 protein	Translation	Mitochondrial	No
F0UAE5	Dead-box protein	Translation	Mitochondrial	No
C6HP67	Dihydrolipoamide s-succinyltransferase	Tricarboxylic-acid pathway	Mitochondrial	No
C0NZ91	Dihydrolipoamide succinyltransferase	Tricarboxylic-acid pathway	Mitochondrial	No
A6RGN1	Elongation factor 1 alpha	Protein biosynthesis	Cytoplasmic	Yes
C0NKS4	Glutaminase	Arginine biosynthesis	Extracellular	Yes
A6R1L6	Histone H2a	DNA binding	Nuclear	Yes
A6R1L7	Histone H2b	DNA binding	Nuclear	Yes
A6R2M7	Histone H4	DNA binding	Nuclear	Yes
C0NDC6	Large subunit ribosomal protein l3	Translation	Mitochondrial	Yes
C0NTX9	L-xylulose reductase	C-compound and carbohydrate metabolism	Cytoplasmic	Yes
C0NZ92	Lyr family protein	Mitochondrial electron transport	Mitochondrial	No
O13373	M antigen	Response to oxidative stress	Cytoplasmic	No
F0U636	Mitochondrial 37s ribosomal protein rsm27	Mitochondrial translation	Mitochondrial	No
F0UH16	Mitochondrial 54s ribosomal protein mrpl51	Mitochondrial translation	Mitochondrial	No
C0NP84	Mitochondrial atp synthase subunit f	ATP synthesis coupled proton transport	Mitochondrial	Yes
A6QUB7	Mitochondrial f1f0 atp synthase subunit f	ATP synthesis coupled proton transport	Mitochondrial	No
C6HMG1	Mitochondrial flavo0 atp synthase subunit f atp17	ATP synthesis coupled proton transport	Mitochondrial	No
A6QY85	Mitochondrial processing peptidase beta subunit	Metal ion binding	Mitochondrial	Yes
C0NEW1	Mitochondrial processing peptidase subunit	Metal ion binding	Mitochondrial	Yes
F0UC56	Mitochondrial ribosomal protein dap3	Protein synthesis	Mitochondrial	No
C0NFC5	Mitochondrial ribosomal protein subunit l51	Mitochondrial translation	Mitochondrial	No
C0NBJ8	Mrna splicing protein prp8	DNA binding	Nuclear	No
C0P0E1	Nadh-ubiquinone oxidoreductase	ATP synthesis coupled electron transport	Mitochondrial	Yes
A6R5Z3	Nascent polypeptide-associated complex subunit beta	Protein transport	Nuclear	No
F0U588	Outer mitochondrial membrane porin protein	Unknown	Cytoplasmic	No
C0NIQ1	Outer mitochondrial membrane protein porin	Unknown	Cytoplasmic	Yes
A6R9I6	Plasma membrane atpase	Hydrogen ion transport	Plasma membrane	Yes
A6QU02	Predicted protein (hcag_00858)	Translation	Cytoskeleton	No
F0UQL8	Processing/enhancing protein	Metal ion binding	Cytoplasmic	No
F0UCG4	Ribose-phosphate pyrophosphokinase	Pentose phosphate pathway	Nuclear	No
C0NCP4	Ribosomal l10 protein	Protein synthesis	Nuclear	Yes
C0NHN4	Ribosomal protein l14	Protein synthesis	Mitochondrial	Yes
A6R1V3	Ribosomal protein l15	Protein synthesis	Mitochondrial	No
A6R1J7	Ribosomal protein l22	Protein synthesis	Nuclear	Yes
A6R6D4	Ribosomal protein l31e	Protein synthesis	Mitochondrial	No
C6H9U0	Ribosomal protein l34 protein	Protein synthesis	Mitochondrial	No
F0U7R8	Ribosomal protein l37	Protein synthesis	Mitochondrial	No
F0UB50	Ribosomal protein l37a	Protein synthesis	Mitochondrial	No
A6R4V4	Ribosomal protein s13	Protein synthesis	Mitochondrial	Yes
A6R4L7	Ribosomal protein s16	Protein synthesis	Mitochondrial	No
F0URZ8	Ribosomal protein s2	Protein synthesis	Mitochondrial	No
A6RE96	Ribosomal protein s5	Protein synthesis	Mitochondrial	Yes
A6REK8	Ribosomal protein s9	Protein synthesis	Mitochondrial	No
C0NLR4	Ribosomal protein srp1	Protein synthesis	Mitochondrial	No
C6HP82	Ribosomal protein yml20	Protein synthesis	Mitochondrial	No
C0NTU6	Rnase iii domain-containing protein	Mitochondrial translation	Mitochondrial	No
C0NMB4	Serine hydroxymethyltransferase	Glycine, serine and threonine metabolism	Mitochondrial	Yes
C6HQC2	Small nuclear ribonucleoprotein	mRNA processing	Mitochondrial	No
A6QYU6	Small nuclear ribonucleoprotein sm d2	mRNA processing	Mitochondrial	Yes
C0NY06	Small nuclear ribonucleoprotein sm d3	mRNA processing	Mitochondrial	Yes
A6QTC0	Sorbitol utilization protein sou1	Carbohydrate metabolism	Cytoplasmic	Yes
F0UF36	Ssdna binding protein	DNA replication	Mitochondrial	No
A6RBH9	Succinate dehydrogenase [ubiquinone] flavoprotein subunit, mitochondrial	Tricarboxylic-acid pathway	Mitochondrial	Yes
C0NNR3	U5 small nuclear ribonucleoprotein component	GTPase activity	Nuclear	Yes
A6QW28	V-type proton atpase subunit a	Proton transmembrane transporter activity	Mitochondrial	No
Q8J1T0	Yeast phase specific protein	Unknown	Extracellular	No
Q00950	YPS-3 protein	Unknown	Extracellular	No
a,b Protein entry and functional category were based on UniProt database (www.uniprot.org).
c Subcellular localization of proteins was based on WoLF PSORT (https://wolfpsort.hgc.jp/).
d Proteins described in the proteome of extracellular vesicles (Albuquerque et al., 2008; Baltazar et al., 2018)

## Sheet: Table S7
Table S7. Possible B epitopes identified in candidate proteins for antigenic targets for the diagnosis of histoplasmosis using BCPREDS
Protein	Peptide	Position	Epitopes sequences	Score
M antigen	1	01-20	MPSGQKGPLDRRHDTLSDPT	0.916
	2	63-82	FIFRQKIQHFDHERVPERAV	0.777
	3	84-103	ARGAGAHGVFTSYNNWSNIT	0.871
	4	141-160	ATRLYTDEGNFDIVGNNVPV	0.962
	5	175-194	AVKPQPDSEIPQAATAHDTA	0.870
	6	347-366	QPGHVVRGIDFTDDPLLQGR	0.756
	7	387-406	PINRPRIPFHNNNRDGAGQM	0.991
	8	411-430	NTAAYTPNSMSNGFPQQANR	0.970
	9	432-451	HNRGFFTAPGRMVNGPLVRE	0.938
	10	517-536	IGVEPPSPDPTFYHNKATVP	0.984
	11	588-607	LDPQRGVNMTYSGADGSIFD	0.860
	12	633-652	TDAYAYGKPVGAVGDGSNEA	0.999
	13	659-678	AAGGDASNGLDQPGVYISND	0.998
Catalase P	1	04-23	DDTFNSYRYKDTPTYTDSNG	0.991
	2	25-44	PVMDPESSQRVGENGPLLLQ	0.908
	3	56-75	DRERIPERVVHAKGAGAYGE	0.968
	4	80-99	DDISDITTINMLKGVGKKTK	0.843
	5	125-144	TKFYTEEGNWDWVFNNTPVF	0.960
	6	204-223	NGYSGHTFKWLTPDGGFNYV	0.840
	7	226-245	HLKTDQGSKTLTNEEATKLA	0.970
	8	323-342	AAFSPSHLVPGVEPSADPVL	0.923
	9	358-377	GVNYQQIPVNCPLRAFNPYQ	0.911
	10	379-398	DGAMAVNGNYGANPNYPSTF	0.995
	11	400-419	RMNYMPVKASQEHEKWTGAV	0.963
	12	436-455	GLWQVLGRQPGQQANFVKNV	0.986
YPS-3	1	36-55	KKPKPKPAPFCGTCNPISGK	1000
	2	57-76	HCDITTSCINTGKRFHCACR	0.921
	3	115-134	CDDNTKPANELCQEVPLYKH	0.845

## Sheet: Table S8
Table S8. Antigenic proteins identified in protein extract of the yeast of Histoplasma capsulatum
Protein a,b	Epitope		Blastomyces dermatitidis			Candida albicans			Cryptococcus gattii			Leishmania chagasi			Paracoccidioides lutzii			Pneumocystis jirovecii			Sporothrix schenckii			Talaromyces marneffeii
	Position b	Score b	Query Cover c	E-value c	Per. Ident. c	Query Cover c	E-value c	Per. Ident. c	Query Cover c	E-value c	Per. Ident. c	Query Cover c	E-value c	Per. Ident. c	Query Cover c	E-value c	Per. Ident. c	Query Cover c	E-value c	Per. Ident. c	Query Cover c	E-value c	Per. Ident. c	Query Cover c	E-value c	Per. Ident. c
C0NVF6 - Catalase P			100	0.0	89.4	94	0.0	61.8	94	0.0	51.4	*	*	*	99	0.0	85.9	12	4.4	26.7	96	0.0	70.8	98	0.0	84.2
1 - MPSGQKGPLDRRHDTLSDPT	01-20	0.916	80	0.008	56.5	75	62	53.3	100	0.97	57.8	40	0.039	75.0	80	0.071	62.5	*	*	*	95	2.5	50.0	100	4.1	42.1
2 - FIFRQKIQHFDHERVPERAV	63-82	0.777	100	7e-17	100	60	0.005	75.0	100	5e-10	82.3	25	0.42	80.0	100	6e-10	75.0	85	0.44	61.5	85	2e-07	70.5	100	6e-16	95.0
3 - ARGAGAHGVFTSYNNWSNIT	84-103	0.871	100	2e-08	75.0	65	4.0	61.5	50	11	70.0	35	1.6	100	100	5e-12	85.0	40	1.7	75.0	55	1.8	75.0	100	2e-12	90.0
5 - AVKPQPDSEIPQAATAHDTA	175-194	0.87	100	3e-11	85.0	50	4.1	80.0	100	3e-07	75.0	40	4.6	100	100	2e-12	90.0	70	9.6	60.0	90	0.007	55.5	100	6e-12	90.0
7 - PINRPRIPFHNNNRDGAGQM	387-406	0.991	95	3e-11	84.2	40	0.72	87.5	100	0.022	65.0	20	2.3	100	100	2e-10	80.0	50	0.61	77.7	85	0.31	60.0	100	6e-12	85.0
11 - LDPQRGVNMTYSGADGSIFD	588-607	0.86	100	7e-05	60.0	70	16	57.1	50	2.7	100	25	2.3	100	40	1.1	87.5	60	1.7	64.2	40	1.7	75.0	80	0.36	62.5
12 - TDAYAYGKPVGAVGDGSNEA	633-652	0.999	95	0.0001	68.4	50	45	70.0	50	7.6	61.5	35	0.40	71.3	90	0.10	55.5	65	1.7	77.7	55	0.32	72.7	65	0.023	76.9
Q9Y7C2 - M antigen			99	0.0	75.2	52	3e-94	42.4	94	0.0	44.0	*	*	*	99	0.0	62.5	*	*	*	94	1e-150	39.1	98	0.0	65.2
1 - DDTFNSYRYKDTPTYTDSNG	04-23	0.991	100	8e-10	75.0	60	0.72	66.6	45	3.8	77.7	35	1.2	57.1	70	2e-05	78.5	50	6.8	60.0	70	0.44	80.0	70	3e-05	78.5
4 - DDISDITTINMLKGVGKKTK	80-99	0.843	100	4e-13	90.0	100	0.36	60.0	95	0.061	57.8	60	6.4	58.3	100	7e-11	85.0	65	0.22	100	90	6e-07	73.6	100	5e-14	95.0
5 - TKFYTEEGNWDWVFNNTPVF	125-144	0.96	100	7e-18	100	100	1e-10	85.0	100	4e-09	75.0	25	1.2	80.0	100	3e-17	95.0	80	0.62	61.1	100	4e-15	90.0	95	1e-15	94.7
7 - HLKTDQGSKTLTNEEATKLA	226-245	0.97	85	4e-10	94.1	60	0.003	91.6	90	0.061	63.1	45	0.31	53.8	90	1e-07	77.7	65	1.2	66.6	95	0.007	68.7	80	3e-09	93.7
8 - AAFSPSHLVPGVEPSADPVL	323-342	0.923	100	3e-14	100	100	1e-06	80.0	100	7e-10	75.0	25	6.4	100	100	8e-14	95.0	45	19	66.6	100	4e-12	90.0	100	3e-13	95.0
10 - DGAMAVNGNYGANPNYPSTF	379-398	0.995	100	1e-15	100	90	7e-05	75.0	80	0.34	52.6	55	1.2	100	100	3e-15	95.0	30	13	83.3	100	2e-06	70.0	100	1e-12	90.0
11 - RMNYMPVKASQEHEKWTGAV	400-419	0.963	70	4e-06	85.7	25	16	100	30	0.96	100	60	0.11	83.3	90	2e-06	66.6	40	0.44	87.5	75	0.31	57.1	95	4e-09	78.9
Q00950 - YPS-3			50	5e-30	55.9	*	*	*	*	*	*	*	*	*	71	1e-46	60.1	*	*	*	*	*	*	24	2.9	31.1
1 - KKPKPKPAPFCGTCNPISGK	36-55	1	10	0.023	71.4	40	4.0	87.5	45	0.68	87.5	30	1.2	83.3	50	0.049	80.0	55	0.037	55.0	40	0.88	87.5	30	2.9	100
3 - CDDNTKPANELCQEVPLYKH	115-134	0.845	50	0.50	80.0	70	0.73	64.2	50	1.4	45.5	20	2.3	100	85	0.049	58.8	80	0.44	85.7	85	2.5	47.0	50	7.9	80.0
a Protein entry and identification were based on UniProt database (www.uniprot.org).
b Epitopes sequences, position and score were based on BCPREDS (http://ailab.ist.psu.edu/bcpred/index.html).
c Query cover, E-value and percent identity were based on NCBI BLASTp (http://blast.ncbi.nlm.nih.gov/).
* No significant similarity found.
